# Supplementary material for: Interaction between Thiamethoxam and Deformed Wing Virus Type A on Wing Characteristics and Expression of Immune and Apoptosis Genes in Apis mellifera
Source: MDPI journal article supplement (doi:10.3390/insects13060515), 2022-05-31
Supplement: s1 [file s1]

## Supplementary Materials

### Title Interaction Between Thiamethoxam and Deformed Wing Virus type A on Wing Characteristics and Expression of Immune and Apoptosis Genes in *Apis mellifera*

Patcharin Phokasem, Wannapha Mookhploy, Sasiprapa Krongdang, Chainarong Sinpoo, and Panuwan Chantawannakul

**Table S1** Primers used for qRT-PCR amplification in this study

| Genes                                        | Primer          | Sequence 5'-3'            | References |
|----------------------------------------------|-----------------|---------------------------|------------|
| Housekeeping                                 |                 |                           |            |
| Ribosomal protein S5 (RPS5)                  | AmRPS5.F        | AATTATTTGGTCGCTGGAATTG    | [54]       |
|                                              | AmRPS5.R        | TAACGTCCAGCAGAATGTGGTA    |            |
| $\beta$ -Actin                               | Actin.F         | TTGTATGCCAACACTGTCCTTT    | [55]       |
|                                              | Actin.R         | TGGCGCGATGATCTTAATTT      |            |
| Immune-related                               |                 |                           |            |
| Antibacterial peptide abaecin                | Abaecin.F       | CAGCATTCGCATACGTACCA      | [50]       |
|                                              | Abaecin.R       | GACCAGGAAACGTTGGAAAC      |            |
| Antibacterial peptide defensin               | Defensin.F      | TGCGCTGCTAACTGTCTCAG      | [50]       |
|                                              | Defensin.R      | AATGGCACTTAACCGAAACG      |            |
| Antibacterial peptide hymenoptaecin          | Hymenopt.F      | CTCTTCTGTGCCGTTGCATA      | [50]       |
|                                              | Hymenopt.R      | GCGTCTCCTGTCATTCCATT      |            |
| Apoptosis-related                            |                 |                           |            |
| Apoptotic peptidase activating factor 1-like | Apaf-1.F        | ACAGATGATAATTTACAGGTGTGGG | [56]       |
|                                              | Apaf-1.R        | TCCGTTCACTCTATCCGTTTGT    |            |
| Bcl-2 family proteins-like                   | Buffy.F         | TGCCGATGCCTGAAAAGTCT      | [56]       |
|                                              | Buffy.R         | TCTGCGATAAGGTTGGCCTG      |            |
| Cysteine proteases3-like                     | Caspase3-like.F | CATGCACAGAAGAAATTCGCCA    | [56]       |
|                                              | Caspase3-like.R | GTTCGTCCCGTTTCGTTGTG      |            |
| Cysteine proteases8-like                     | Caspase8-like.F | AAAACAATTGATGCAGTAGGGG    | [56]       |
|                                              | Caspase8-like.R | TTCTGGAAATTGAAAATCGGAAGA  |            |
| Cysteine proteases9-like                     | Caspase9-like.F | TGGCCAAAGCTTGTTGAAAATCA   | [56]       |
|                                              | Caspase9-like.R | ATGCAAAAGGTCCCCGTGTT      |            |
|                                              | DWV.F           | CGAAACCAACTTCTGAGGAA      | [53]       |

|                               |               |                        |      |
|-------------------------------|---------------|------------------------|------|
| Deformed wing virus           | DWV.R         | GTGTTGATCCCTGAGGCTTA   |      |
| Black queen cell virus        | BQCV-qF7893   | AGTGGCGGAGATGTATGC     | [46] |
|                               | BQCV-qB8150   | GGAGGTGAAGTGGCTATATC   |      |
| Kashmir bee virus             | KBV-qF6639    | CCATACCTGCTGATAACC     | [46] |
|                               | KIABPV-qB6707 | CTGAATAATACTGTGCGTATC  |      |
| Sacbrood virus                | SBV-qF3164    | TTGGAACCTACGCATTCTCTG  | [46] |
|                               | SBV-qB3461    | GCTCTAACCTCGCATCAAC    |      |
| Acute bee paralysis virus     | ABPV-qF6548   | TCATACCTGCCGATCAAG     | [46] |
|                               | KIABPV-qB6707 | CTGAATAATACTGTGCGTATC  |      |
| Chronic bee paralysis virus   | CBPV1-qF1818  | CAA CCTGCCTCA ACACAG   | [46] |
|                               | CBPV1-qB2077  | AAT CTGGCAAGG TTGACTGG |      |
| Israeli acute paralysis virus | IAPV.F        | CCATGCCTGGCGATTAC      | [47] |
|                               | IAPV.R        | CTGAATAATACTGTGCGTATC  |      |

**Table S2** Statistic of survival in white-eyed pupae honey bees

| Treatment    |             | Log-rank test: $X^2$ and <i>p-value</i> |              |           |            |
|--------------|-------------|-----------------------------------------|--------------|-----------|------------|
|              |             | control                                 | Thaimethoxam |           |            |
|              |             |                                         | 0.001 ng/μl  | 1.4 ng/μl | 14.3 ng/μl |
| control      |             |                                         |              |           |            |
| Thiamethoxam | 0.001 ng/μl | 0.059                                   |              |           |            |
|              | 1.4 ng/μl   | <0.0001                                 | 0.013        |           |            |
|              | 14.3 ng/μl  | <0.0001                                 | 0.028        | 0.128     |            |

Table S3 Statistic of survival in newly emerged adult honey bees

| Treatment    |                     | Log-rank test: $X^2$ and <i>p</i> value |        |        |                |                    |                        |           |                   |                  |               |                       |                       |
|--------------|---------------------|-----------------------------------------|--------|--------|----------------|--------------------|------------------------|-----------|-------------------|------------------|---------------|-----------------------|-----------------------|
|              |                     | control                                 |        |        | Thiamethoxam   |                    |                        |           |                   |                  |               |                       |                       |
|              |                     | control                                 | PBS    | DWV    | 0.001<br>ng/μl | 0.001ng/μl<br>+PBS | 0.001<br>ng/μl+<br>DWV | 1.4 ng/μl | 1.4 ng/μl<br>+PBS | 1.4 ng/μl<br>DWV | 14.3<br>ng/μl | 14.3<br>ng/μl+<br>PBS | 14.3<br>ng/μl+<br>DWV |
| control      | control             |                                         |        |        |                |                    |                        |           |                   |                  |               |                       |                       |
|              | PBS                 | 0.215                                   |        |        |                |                    |                        |           |                   |                  |               |                       |                       |
|              | DWV                 | <0.001                                  | 0.014  |        |                |                    |                        |           |                   |                  |               |                       |                       |
| Thiamethoxam | 0.001 ng/μl         | 0.633                                   | 0.110  | <0.001 |                |                    |                        |           |                   |                  |               |                       |                       |
|              | 0.001ng/μl +PBS     | 0.351                                   | 0.811  | 0.015  | 0.189          |                    |                        |           |                   |                  |               |                       |                       |
|              | 0.001 ng/μl<br>+DWV | <0.001                                  | <0.001 | 0.012  | <0.001         | <0.001             |                        |           |                   |                  |               |                       |                       |
|              | 1.4 ng/μl           | 0.394                                   | 0.865  | 0.049  | 0.222          | 0.976              | 0.001                  |           |                   |                  |               |                       |                       |
|              | 1.4 ng/μl+ PBS      | 0.842                                   | 0.455  | 0.016  | 0.556          | 0.588              | <0.001                 | 0.599     |                   |                  |               |                       |                       |
|              | 1.4 ng/μl+ DWV      | <0.001                                  | <0.001 | <0.001 | <0.001         | <0.001             | 0.310                  | <0.001    | <0.001            |                  |               |                       |                       |
|              | 14.3 ng/μl          | <0.001                                  | 0.005  | 0.044  | <0.001         | <0.001             | 0.800                  | 0.002     | <0.001            | 0.622            |               |                       |                       |
|              | 14.3 ng/μl +PBS     | <0.001                                  | 0.016  | 0.031  | <0.001         | <0.001             | 0.649                  | 0.001     | <0.001            | 0.792            | 0.863         |                       |                       |
|              | 14.3 ng/μl<br>+DWV  | <0.001                                  | <0.001 | <0.001 | <0.001         | <0.001             | 0.065                  | <0.001    | <0.001            | 0.331            | 0.211         | 0.316                 |                       |

**Table S4 Statistic of DWV load in newly emerged adult honey bees**

| Games-Howell Post-Hoc Test |                |                  |             |       |             |                 |           |                |               |            |                  |                  |           |                |                |
|----------------------------|----------------|------------------|-------------|-------|-------------|-----------------|-----------|----------------|---------------|------------|------------------|------------------|-----------|----------------|----------------|
| p-value                    | Characteristic | Treatment        | Normal wing |       |             |                 |           |                | Deformed wing |            |                  |                  |           |                |                |
|                            |                |                  | control     | PBS   | 0.001 ng/μl | 0.001ng/μl +PBS | 1.4 ng/μl | 1.4 ng/μl +PBS | DWV           | 0.001ng/μl | 0.001 ng/μl +PBS | 0.001 ng/μl +DWV | 1.4 ng/μl | 1.4 ng/μl +PBS | 1.4 ng/μl +DWV |
|                            | Normal wing    | control          |             |       |             |                 |           |                |               |            |                  |                  |           |                |                |
|                            |                | PBS              | 0.962       |       |             |                 |           |                |               |            |                  |                  |           |                |                |
|                            |                | 0.001 ng/μl      | 1.000       | 1.000 |             |                 |           |                |               |            |                  |                  |           |                |                |
|                            |                | 0.001 ng/μl+ PBS | 1.000       | 1.000 | 1.000       |                 |           |                |               |            |                  |                  |           |                |                |
|                            |                | 1.4 ng/μl        | 0.220       | 0.774 | 0.663       | 0.783           |           |                |               |            |                  |                  |           |                |                |
|                            |                | 1.4 ng/μl+ PBS   | 0.753       | 0.936 | 0.888       | 0.906           | 1.000     |                |               |            |                  |                  |           |                |                |
|                            | Deformed wing  | DWV              | 0.022       | 0.022 | 0.022       | 0.022           | 0.022     | 0.022          |               |            |                  |                  |           |                |                |
|                            |                | 0.001 ng/μl      | 0.103       | 0.664 | 0.572       | 0.737           | 1.000     | 1.000          | 0.022         |            |                  |                  |           |                |                |
|                            |                | 0.001 ng/μl +PBS | 0.396       | 0.654 | 0.572       | 0.62            | 0.991     | 1.000          | 0.022         | 0.978      |                  |                  |           |                |                |
|                            |                | 0.001ng/μl +DWV  | 0.014       | 0.014 | 0.014       | 0.014           | 0.015     | 0.014          | 1.000         | 0.015      | 0.014            |                  |           |                |                |
|                            |                | 1.4 ng/μl        | 0.031       | 0.079 | 0.081       | 0.167           | 0.583     | 0.998          | 0.022         | 0.378      | 1.000            | 0.015            |           |                |                |
| 1.4 ng/μl +PBS             |                | 0.394            | 0.531       | 0.473 | 0.488       | 0.854           | 0.995     | 0.022          | 0.822         | 1.000      | 0.014            | 1.000            |           |                |                |
| 1.4 ng/μl +DWV             |                | 0.010            | 0.010       | 0.010 | 0.010       | 0.010           | 0.010     | 1.000          | 0.010         | 0.010      | 1.000            | 0.011            | 0.010     |                |                |

Table S5 Statistic of *defensin* in newly emerged adult honey bees

| Games-Howell Post-Hoc Test |       |       |       |         |         |             |             |             |       |       |           |           |
|----------------------------|-------|-------|-------|---------|---------|-------------|-------------|-------------|-------|-------|-----------|-----------|
|                            | C     | PBS   | DWV   | 0.001+n | 0.001+d | 0.001+PBS+n | 0.001+PBS+d | 0.001+DWV+d | 1.4+n | 1.4+d | 1.4+PBS+n | 1.4+PBS+d |
| <b>PBS</b>                 | 1.000 |       |       |         |         |             |             |             |       |       |           |           |
| <b>DWV</b>                 | 0.003 | 0.088 |       |         |         |             |             |             |       |       |           |           |
| <b>0.001+n</b>             | 1.000 | 1.000 | 0.133 |         |         |             |             |             |       |       |           |           |
| <b>0.001+d</b>             | 0.029 | 0.432 | 0.026 | 0.557   |         |             |             |             |       |       |           |           |
| <b>0.001+PBS+n</b>         | 0.320 | 0.981 | 0.002 | 0.981   | 0.003   |             |             |             |       |       |           |           |
| <b>0.001+PBS+d</b>         | 0.960 | 0.980 | 0.316 | 0.993   | 0.985   | 0.685       |             |             |       |       |           |           |
| <b>0.001+DWV+d</b>         | 0.951 | 0.979 | 0.258 | 0.992   | 0.966   | 0.639       | 0.992       |             |       |       |           |           |
| <b>1.4+n</b>               | 0.066 | 0.470 | 0.048 | 0.596   | 0.997   | 0.012       | 0.596       | 0.982       |       |       |           |           |
| <b>1.4+d</b>               | 1.000 | 1.000 | 0.655 | 1.000   | 0.998   | 0.986       | 1.000       | 1.000       | 0.999 |       |           |           |
| <b>1.4+PBS+n</b>           | 0.651 | 0.849 | 0.109 | 0.923   | 0.943   | 0.290       | 0.923       | 1.000       | 0.972 | 1.000 |           |           |
| <b>1.4+PBS+d</b>           | 1.000 | 1.000 | 0.078 | 1.000   | 0.485   | 0.815       | 1.000       | 0.998       | 0.530 | 1.000 | 0.949     |           |
| <b>1.4+DWV+d</b>           | 0.179 | 0.455 | 0.102 | 0.587   | 1.000   | 0.083       | 0.587       | 0.979       | 1.000 | 0.998 | 0.978     | 0.537     |

n = normal wing

d = deformed wing

**Table S6** Statistic of *abaecin* in newly emerged adult honey bees

| Games-Howell Post-Hoc Test |       |       |       |         |         |             |             |             |       |       |           |           |
|----------------------------|-------|-------|-------|---------|---------|-------------|-------------|-------------|-------|-------|-----------|-----------|
|                            | C     | PBS   | DWV   | 0.001+n | 0.001+d | 0.001+PBS+n | 0.001+PBS+d | 0.001+DWV+d | 1.4+n | 1.4+d | 1.4+PBS+n | 1.4+PBS+d |
| <b>PBS</b>                 | 0.886 |       |       |         |         |             |             |             |       |       |           |           |
| <b>DWV</b>                 | 0.034 | 0.372 |       |         |         |             |             |             |       |       |           |           |
| <b>0.001+n</b>             | 0.874 | 1.000 | 0.103 |         |         |             |             |             |       |       |           |           |
| <b>0.001+d</b>             | 0.992 | 0.771 | 0.125 | 0.777   |         |             |             |             |       |       |           |           |
| <b>0.001+PBS+n</b>         | 0.999 | 0.940 | 0.056 | 0.940   | 0.932   |             |             |             |       |       |           |           |
| <b>0.001+PBS+d</b>         | 1.000 | 0.967 | 0.330 | 0.981   | 1.000   | 1.000       |             |             |       |       |           |           |
| <b>0.001+DWV+d</b>         | 0.181 | 0.990 | 0.315 | 0.732   | 0.374   | 0.200       | 0.722       |             |       |       |           |           |
| <b>1.4+n</b>               | 0.710 | 1.000 | 0.711 | 0.983   | 0.604   | 0.777       | 0.872       | 1.000       |       |       |           |           |
| <b>1.4+d</b>               | 0.434 | 0.254 | 0.059 | 0.258   | 0.866   | 0.367       | 0.853       | 0.143       | 0.203 |       |           |           |
| <b>1.4+PBS+n</b>           | 0.667 | 1.000 | 0.080 | 1.000   | 0.711   | 0.684       | 0.968       | 0.536       | 0.972 | 0.261 |           |           |
| <b>1.4+PBS+d</b>           | 1.000 | 0.965 | 0.078 | 0.981   | 0.992   | 1.000       | 1.000       | 0.414       | 0.819 | 0.439 | 0.935     |           |
| <b>1.4+DWV+d</b>           | 0.660 | 1.000 | 0.454 | 0.993   | 0.589   | 0.736       | 0.887       | 1.000       | 1.000 | 0.183 | 0.983     | 0.815     |

**n** = normal wing

**d** = deformed wing

**Table S7** Statistic of *hymenoptaecin* in newly emerged adult honey bees

| Games-Howell Post-Hoc Test |       |       |       |         |         |             |             |             |       |       |           |           |
|----------------------------|-------|-------|-------|---------|---------|-------------|-------------|-------------|-------|-------|-----------|-----------|
|                            | C     | PBS   | DWV   | 0.001+n | 0.001+d | 0.001+PBS+n | 0.001+PBS+d | 0.001+DWV+d | 1.4+n | 1.4+d | 1.4+PBS+n | 1.4+PBS+d |
| <b>PBS</b>                 | 0.388 |       |       |         |         |             |             |             |       |       |           |           |
| <b>DWV</b>                 | 0.011 | 0.032 |       |         |         |             |             |             |       |       |           |           |
| <b>0.001+n</b>             | 0.429 | 0.999 | 0.161 |         |         |             |             |             |       |       |           |           |
| <b>0.001+d</b>             | 0.250 | 0.700 | 0.507 | 0.967   |         |             |             |             |       |       |           |           |
| <b>0.001+PBS+n</b>         | 0.989 | 0.554 | 0.008 | 0.533   | 0.289   |             |             |             |       |       |           |           |
| <b>0.001+PBS+d</b>         | 0.349 | 0.736 | 0.826 | 0.945   | 1.000   | 0.394       |             |             |       |       |           |           |
| <b>0.001+DWV+d</b>         | 0.005 | 0.116 | 0.550 | 0.338   | 0.837   | 0.012       | 0.993       |             |       |       |           |           |
| <b>1.4+n</b>               | 0.517 | 0.929 | 0.738 | 0.997   | 1.000   | 0.582       | 1.000       | 0.949       |       |       |           |           |
| <b>1.4+d</b>               | 0.045 | 0.223 | 0.316 | 0.677   | 1.000   | 0.045       | 1.000       | 0.742       | 1.000 |       |           |           |
| <b>1.4+PBS+n</b>           | 0.004 | 0.390 | 0.103 | 0.916   | 1.000   | 0.017       | 0.999       | 0.011       | 1.000 | 0.815 |           |           |
| <b>1.4+PBS+d</b>           | 0.325 | 1.000 | 0.064 | 1.000   | 0.877   | 0.434       | 0.866       | 0.185       | 0.984 | 0.411 | 0.665     |           |
| <b>1.4+DWV+d</b>           | 0.006 | 0.042 | 0.999 | 0.210   | 0.625   | 0.005       | 0.913       | 0.736       | 0.826 | 0.443 | 0.093     | 0.086     |

**n** = normal wing

**d** = deformed wing

**Table S8** Statistic of *caspase3-like* in newly emerged adult honey bees

| Games-Howell Post-Hoc Test |       |       |       |         |         |             |             |             |       |       |           |           |
|----------------------------|-------|-------|-------|---------|---------|-------------|-------------|-------------|-------|-------|-----------|-----------|
|                            | C     | PBS   | DWV   | 0.001+n | 0.001+d | 0.001+PBS+n | 0.001+PBS+d | 0.001+DWV+d | 1.4+n | 1.4+d | 1.4+PBS+n | 1.4+PBS+d |
| <b>PBS</b>                 | 0.905 |       |       |         |         |             |             |             |       |       |           |           |
| <b>DWV</b>                 | 0.355 | 0.193 |       |         |         |             |             |             |       |       |           |           |
| <b>0.001+n</b>             | 0.585 | 1.000 | 0.022 |         |         |             |             |             |       |       |           |           |
| <b>0.001+d</b>             | 0.246 | 0.826 | 0.001 | 0.603   |         |             |             |             |       |       |           |           |
| <b>0.001+PBS+n</b>         | 1.000 | 0.998 | 0.919 | 0.984   | 0.853   |             |             |             |       |       |           |           |
| <b>0.001+PBS+d</b>         | 0.488 | 0.879 | 0.208 | 0.882   | 0.997   | 0.819       |             |             |       |       |           |           |
| <b>0.001+DWV+d</b>         | 0.774 | 0.392 | 1.000 | 0.291   | 0.198   | 0.973       | 0.219       |             |       |       |           |           |
| <b>1.4+n</b>               | 0.629 | 1.000 | 0.052 | 1.000   | 0.773   | 0.985       | 0.903       | 0.287       |       |       |           |           |
| <b>1.4+d</b>               | 0.664 | 1.000 | 0.047 | 1.000   | 0.673   | 0.989       | 0.877       | 0.302       | 1.000 |       |           |           |
| <b>1.4+PBS+n</b>           | 0.808 | 1.000 | 0.025 | 0.996   | 0.277   | 0.998       | 0.761       | 0.366       | 0.997 | 1.000 |           |           |
| <b>1.4+PBS+d</b>           | 1.000 | 0.999 | 0.547 | 0.970   | 0.684   | 1.000       | 0.727       | 0.771       | 0.974 | 0.983 | 0.999     |           |
| <b>1.4+DWV+d</b>           | 0.610 | 1.000 | 0.008 | 1.000   | 0.330   | 0.989       | 0.838       | 0.312       | 1.000 | 1.000 | 0.999     | 0.980     |

**n** = normal wing

**d** = deformed wing



**Table S9** Statistic of *caspase8-like* in newly emerged adult honey bees

| Games-Howell Post-Hoc Test |       |       |       |         |         |             |             |             |       |       |           |           |
|----------------------------|-------|-------|-------|---------|---------|-------------|-------------|-------------|-------|-------|-----------|-----------|
|                            | C     | PBS   | DWV   | 0.001+n | 0.001+d | 0.001+PBS+n | 0.001+PBS+d | 0.001+DWV+d | 1.4+n | 1.4+d | 1.4+PBS+n | 1.4+PBS+d |
| <b>PBS</b>                 | 0.993 |       |       |         |         |             |             |             |       |       |           |           |
| <b>DWV</b>                 | 0.071 | 0.070 |       |         |         |             |             |             |       |       |           |           |
| <b>0.001+n</b>             | 0.392 | 0.847 | 0.014 |         |         |             |             |             |       |       |           |           |
| <b>0.001+d</b>             | 0.441 | 0.880 | 0.019 | 1.000   |         |             |             |             |       |       |           |           |
| <b>0.001+PBS+n</b>         | 1.000 | 0.929 | 0.033 | 0.228   | 0.279   |             |             |             |       |       |           |           |
| <b>0.001+PBS+d</b>         | 0.161 | 0.466 | 0.006 | 0.983   | 0.983   | 0.075       |             |             |       |       |           |           |
| <b>0.001+DWV+d</b>         | 1.000 | 1.000 | 0.046 | 0.528   | 0.585   | 0.994       | 0.211       |             |       |       |           |           |
| <b>1.4+n</b>               | 0.768 | 1.000 | 0.016 | 0.745   | 0.809   | 0.266       | 0.277       | 0.939       |       |       |           |           |
| <b>1.4+d</b>               | 0.140 | 0.361 | 0.011 | 0.875   | 0.880   | 0.104       | 1.000       | 0.182       | 0.282 |       |           |           |
| <b>1.4+PBS+n</b>           | 1.000 | 0.999 | 0.022 | 0.378   | 0.446   | 0.962       | 0.123       | 1.000       | 0.689 | 0.151 |           |           |
| <b>1.4+PBS+d</b>           | 0.991 | 1.000 | 0.317 | 1.000   | 1.000   | 0.970       | 0.967       | 0.999       | 1.000 | 0.907 | 0.998     |           |
| <b>1.4+DWV+d</b>           | 0.514 | 0.916 | 0.031 | 1.000   | 1.000   | 0.358       | 0.985       | 0.663       | 0.878 | 0.896 | 0.540     | 1.000     |

**n** = normal wing

**d** = deformed wing

**Table S10** Statistic of *caspase9-like* in newly emerged adult honey bees

| Games-Howell Post-Hoc Test |       |       |       |         |         |             |             |             |       |       |           |           |
|----------------------------|-------|-------|-------|---------|---------|-------------|-------------|-------------|-------|-------|-----------|-----------|
|                            | C     | PBS   | DWV   | 0.001+n | 0.001+d | 0.001+PBS+n | 0.001+PBS+d | 0.001+DWV+d | 1.4+n | 1.4+d | 1.4+PBS+n | 1.4+PBS+d |
| <b>PBS</b>                 | 1.000 |       |       |         |         |             |             |             |       |       |           |           |
| <b>DWV</b>                 | 0.018 | 0.115 |       |         |         |             |             |             |       |       |           |           |
| <b>0.001+n</b>             | 0.999 | 1.000 | 0.036 |         |         |             |             |             |       |       |           |           |
| <b>0.001+d</b>             | 0.283 | 0.794 | 0.075 | 0.115   |         |             |             |             |       |       |           |           |
| <b>0.001+PBS+n</b>         | 1.000 | 1.000 | 0.026 | 1.000   | 0.187   |             |             |             |       |       |           |           |
| <b>0.001+PBS+d</b>         | 0.987 | 1.000 | 0.053 | 1.000   | 0.105   | 1.000       |             |             |       |       |           |           |
| <b>0.001+DWV+d</b>         | 0.864 | 0.999 | 0.014 | 0.392   | 0.052   | 0.552       | 0.308       |             |       |       |           |           |
| <b>1.4+n</b>               | 0.999 | 1.000 | 0.014 | 0.864   | 0.157   | 0.956       | 0.724       | 0.997       |       |       |           |           |
| <b>1.4+d</b>               | 1.000 | 1.000 | 0.098 | 1.000   | 0.901   | 1.000       | 1.000       | 0.913       | 0.993 |       |           |           |
| <b>1.4+PBS+n</b>           | 0.999 | 1.000 | 0.014 | 0.865   | 0.169   | 0.954       | 0.732       | 0.998       | 1.000 | 0.993 |           |           |
| <b>1.4+PBS+d</b>           | 0.600 | 0.825 | 0.047 | 0.496   | 0.268   | 0.524       | 0.470       | 0.851       | 0.728 | 0.612 | 0.738     |           |
| <b>1.4+DWV+d</b>           | 0.998 | 1.000 | 0.026 | 0.632   | 0.031   | 0.872       | 0.358       | 0.961       | 1.000 | 0.990 | 1.000     | 0.683     |

**n** = normal wing

**d** = deformed wing

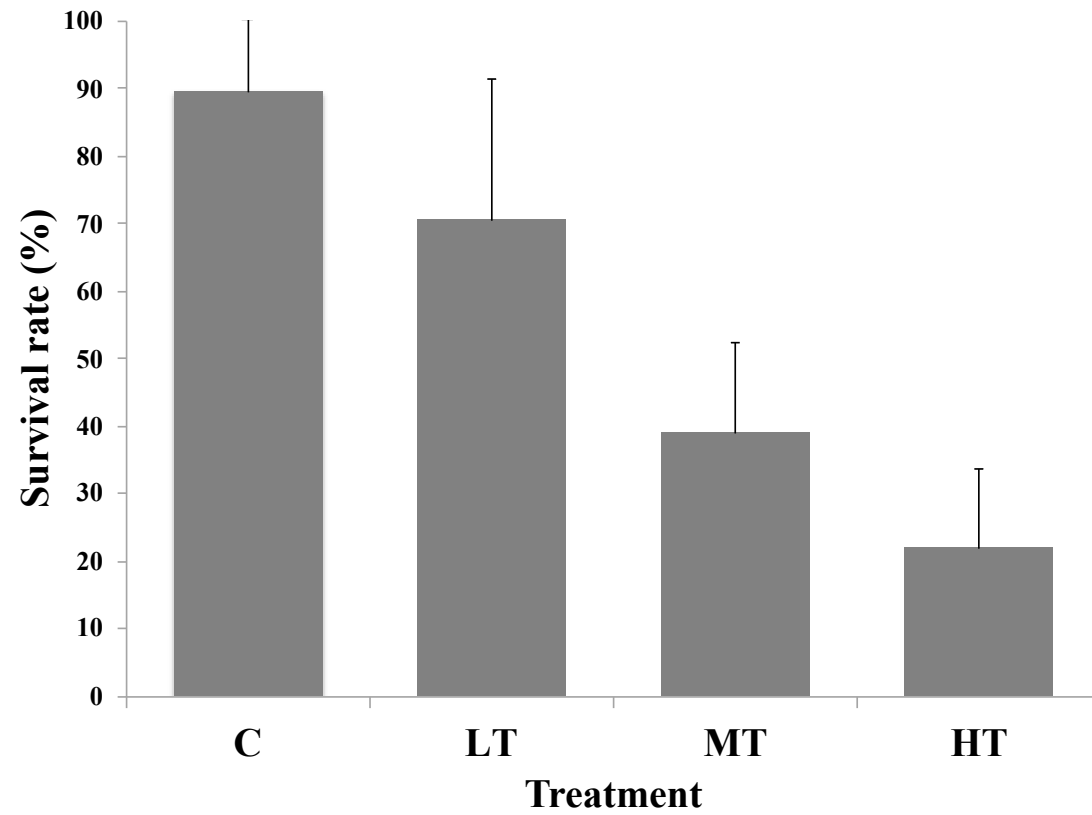

**Figure S1.** The percentage of survival rate of white-eyed pupae honey bees at 12 days post-fed.

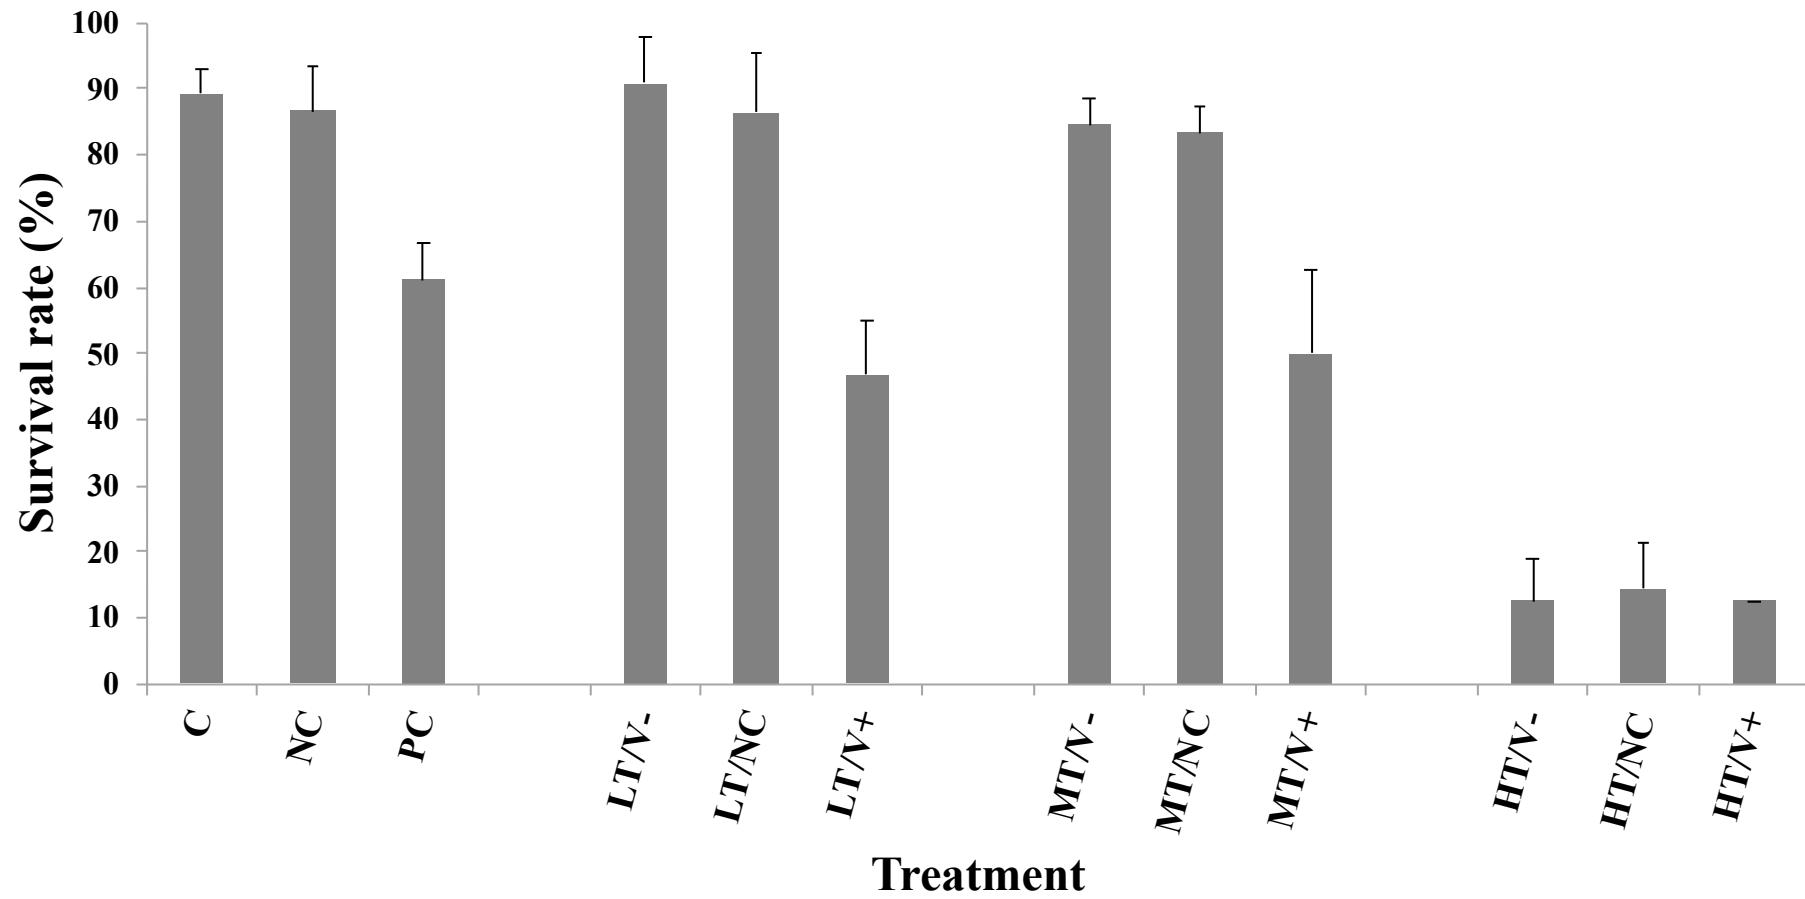

**Figure S2.** The percentage of survival rates in newly emerged adult honey bees.
